# Supplementary material for: N-terminus of Flagellin Fused to an Antigen Improves Vaccine Efficacy against Pasteurella Multocida Infection in Chickens
Source: PubMed Central journal article supplement (PMC7349934; doi:10.3390/vaccines8020283), 2020-06-06
Supplement: vaccines-08-00283-s001.pdf [file vaccines-08-00283-s001.pdf]

**Table S1. Primers for gene cloning and recombinant protein construction.**

| Target Gene     |   | Sequence (5'-3')                                             | RE site | Gene-Length (bp) | DNA Templates                    |
|-----------------|---|--------------------------------------------------------------|---------|------------------|----------------------------------|
| plpE            | F | <sup>1</sup> <i>ggatccatgaaacaaatcgtttataaaac</i>            | BamHI   | 1008             | <i>ATCC 15742</i>                |
|                 | R | <i>gaattcttattgtgcttggtgactttttc</i>                         | EcoRI   |                  |                                  |
| FliC            | F | <i>ggatccatgaaaagacaatcgtagc</i>                             | BamHI   | 1500             | <i>ATCC 14028</i>                |
|                 | R | <i>gtcgacttagaagtgtacgcgtaaac</i>                            | Sall    |                  |                                  |
| tplpE           | F | <sup>2</sup> <b>ggcggggg</b> <i>cggcagcggtagcgctggaaatcg</i> | -       | 195              | <i>plpE</i>                      |
|                 | R | <i>ctcgagaaaggaggattgttgactattt</i>                          | XhoI    |                  |                                  |
| nFliC           | F | <i>ggatccatggcacaagtcattaatacaaac</i>                        | BamHI   | 312              | <i>FliC</i>                      |
|                 | R | <b>gctgccgccccgc</b> <i>cagactgaaccgccagttc</i>              | -       |                  |                                  |
| nFliC-<br>tplpE | F | <i>nFliC F</i>                                               | BamHI   | 495              | <i>tplpE</i> and<br><i>nFliC</i> |
|                 | R | <i>tplpE R</i>                                               | XhoI    |                  |                                  |

<sup>1</sup> Italics in the primers represent restriction enzyme (RE) sites. <sup>2</sup> Bold fonts in the primers represent glycine-serine linkers.

**Table S2. Primers for cytokine genes.**

| Target Gene   |   | Sequence (5'-3')        | Length (bp) | Annealing Temp. (°C) | GenBank        |
|---------------|---|-------------------------|-------------|----------------------|----------------|
| IL-1 $\beta$  | F | tgggcatcaagggtcaca      | 244         | 55                   | NM_204524.1    |
|               | R | tcgggttggttggtgatg      |             |                      |                |
| IL-6          | F | caaggtgacggaggaggac     | 253         | 55                   | JQ897539       |
|               | R | tggcgaggaggatttct       |             |                      |                |
| IL-8          | F | catcatgaagcattccatct    | 204         | 50                   | HM179639.1     |
|               | R | cttcca agggatcttcattt   |             |                      |                |
| IFN- $\gamma$ | F | gacggtggacattatt        | 255         | 50                   | HQ739082       |
|               | R | ggctttgcgctggattc       |             |                      |                |
| IL-12         | F | ccaagacctggagcacaccgaag | 163         | 61                   | AY262752.1     |
|               | R | gatccctggcctgcacagaga   |             |                      |                |
| IL-4          | F | tgtgccacgctgtgcttaca    | 193         | 61                   | AJ621249.1     |
|               | R | cttgtggcagtgctggctctcc  |             |                      |                |
| IL-10         | F | ctgcgcttctacacagatg     | 427         | 55                   | XM_025143715.1 |
|               | R | ccgttctcatccatctgc      |             |                      |                |
| GAPDH         | F | tgctgccagaacatcatcc     | 142         | 55                   | NM_204305      |
|               | R | acggcaggtcaggtcaacaa    |             |                      |                |

GAPDH: glyceraldehyde 3 phosphate dehydrogenase; IL: interleukin; IFN- $\gamma$ : interferon gamma.
